# Supplementary material for: Effectiveness and Safety of Direct Oral Anticoagulant for Secondary Prevention in Asians with Atrial Fibrillation
Source: PubMed Central journal article supplement (PMC6947173; doi:10.3390/jcm8122228), 2019-12-17
Supplement: jcm-08-02228-s001.pdf [file jcm-08-02228-s001.pdf]

## Supplementary Materials

# Effectiveness and safety of direct oral anticoagulants for secondary prevention in patients with non-valvular atrial fibrillation

### Tables

Table S1. Definition of covariates and study outcomes

Table S2. Characteristics of study population after IPTW adjustment

Table S3. Subgroup analysis of clinical outcomes according to antithrombotic therapy

Table S4. Crude and multivariate-adjusted risk of clinical outcomes according to antithrombotic therapy

Table S5. Crude and multivariate-adjusted risk of clinical outcomes according to antithrombotic therapy (Warfarin vs 4 DOACs)

Table S6. Characteristics of the study population with warfarin and dosage of DOAC

Table S7. Comparison of clinical outcomes between patients with warfarin and regular dose DOAC

### Figures

Figure S1. Study flow

Figure S2. Distribution of propensity scores before and after IPTW

Figure S3. Kaplan-Meier curve of clinical outcomes according to antithrombotic therapy (Warfarin vs. pooled DOACs)

Figure S4. Kaplan-Meier curve of clinical outcomes according to antithrombotic therapy (Warfarin vs. 4 DOACs)

Figure S5. Subgroup analysis of clinical outcomes according to antithrombotic therapy

Figure S6. Kaplan-Meier curve of clinical outcomes among patients with warfarin and regular dose DOAC

Figure S7. Comparison of clinical outcomes between patients with warfarin and 4 regular dose DOACs

Figure S8. Kaplan-Meier curve of clinical outcomes among patients with warfarin and four different regular dose DOAC

Figure S9. Sensitivity analysis comparing clinical outcomes according to antithrombotic therapy during a 1-year follow-up

**Table S1. Definition of covariates and study outcomes**

| <b>Diagnosis</b>                                | <b>ICD-10-CM code and definition</b>                                                                                                                                                                                                              | <b>Diagnostic definition</b>                         |
|-------------------------------------------------|---------------------------------------------------------------------------------------------------------------------------------------------------------------------------------------------------------------------------------------------------|------------------------------------------------------|
| <b>Inclusion/exclusion criteria</b>             |                                                                                                                                                                                                                                                   |                                                      |
| <b>Atrial fibrillation</b>                      | I48.0-48.4, I48.9                                                                                                                                                                                                                                 | Admission or outpatient department $\geq$ 1          |
| <b>Valvular atrial fibrillation</b>             | I05.0, I05.2, I05.9, Z95.2-Z95.4                                                                                                                                                                                                                  |                                                      |
| <b>Pulmonary embolism</b>                       | I26                                                                                                                                                                                                                                               | Admission $\geq$ 1                                   |
| <b>Deep vein thrombosis</b>                     | I80.2                                                                                                                                                                                                                                             | Admission $\geq$ 1                                   |
| <b>Received joint replacement operation</b>     | N0711, N1711, N1721, N2070, N3710, N3721, N3717, N3720, N2072, N2077, N3722, N3727                                                                                                                                                                | Admission $\geq$ 1                                   |
| <b>End stage renal disease</b>                  | N18.5, Z49                                                                                                                                                                                                                                        | Dialysis $\geq$ 2                                    |
| <b>Comorbidities</b>                            |                                                                                                                                                                                                                                                   |                                                      |
| <b>Hypertension</b>                             | I10-I13, I15; and minimum 1 prescription of anti-hypertensive drug (thiazide, loop diuretics, aldosterone antagonist, alpha-/beta-blocker, calcium-channel blocker, angiotensin-converting enzyme inhibitor, angiotensin II receptor blocker).    | Admission $\geq$ 1 or outpatient department $\geq$ 2 |
| <b>Diabetes mellitus</b>                        | E11-E14; and minimum 1 prescription of anti-diabetic drugs (sulfonylureas, metformin, meglitinides, thiazolidinediones, dipeptidyl peptidase-4 inhibitors, $\alpha$ -glucosidase inhibitors, and insulin).                                        | Admission $\geq$ 1 or outpatient department $\geq$ 2 |
| <b>Dyslipidemia</b>                             | E78                                                                                                                                                                                                                                               | Admission or outpatient department $\geq$ 1          |
| <b>Heart failure</b>                            | I50                                                                                                                                                                                                                                               | Admission or outpatient department $\geq$ 1          |
| <b>Vascular disease</b>                         |                                                                                                                                                                                                                                                   |                                                      |
| <b>Prior MI</b>                                 | I21, I22                                                                                                                                                                                                                                          | Admission or outpatient department $\geq$ 1          |
| <b>PAD</b>                                      | I70, I73                                                                                                                                                                                                                                          | Admission or outpatient department $\geq$ 2          |
| <b>Renal disease</b>                            | I13.1, N03, N05, N10-N19, Z49, Z94.0, Z99.2                                                                                                                                                                                                       | Admission or outpatient department $\geq$ 1          |
| <b>Liver disease</b>                            | K70, K72-K76, K71.3-K71.7                                                                                                                                                                                                                         | Admission or outpatient department $\geq$ 1          |
| <b>COPD</b>                                     | J41-44                                                                                                                                                                                                                                            | Admission $\geq$ 1                                   |
| <b>Cancer</b>                                   | C00-97 and RID code (V193)                                                                                                                                                                                                                        | Admission or outpatient department $\geq$ 1          |
| <b>Scores</b>                                   |                                                                                                                                                                                                                                                   |                                                      |
| <b>CHA<sub>2</sub>DS<sub>2</sub>-VASc score</b> | Heart failure (1 point), hypertension (1 point), age $\geq$ 75 years (2 points), diabetes (1 point), previous stroke/systemic embolism/transient ischemic attack (2 points), vascular disease (prior MI or PAD, 1 point) and female sex (1 point) |                                                      |
| <b>HAS-BLED score*</b>                          | Hypertension (1 point), liver disease (1 point), renal disease (1 point), stroke history (1 point), bleeding history (1 point), age $>$ 65 years (1 point) and drug (concomitant use of NSAID or antiplatelet agent, 1 point)                     |                                                      |

| <b>Clinical outcome</b>          |                                                            |                                                                                               |
|----------------------------------|------------------------------------------------------------|-----------------------------------------------------------------------------------------------|
| <b>Recurrent stroke</b>          | I63, I64                                                   | Primary diagnosis, admission $\geq 1$ ( $\geq 3$ days) and brain imaging (CT or MRI) $\geq 1$ |
| <b>Intracranial hemorrhage</b>   | I60-62                                                     | Primary diagnosis, admission $\geq 1$ ( $\geq 3$ days) and brain imaging (CT or MRI) $\geq 1$ |
| <b>Gastrointestinal bleeding</b> |                                                            |                                                                                               |
| <b>Major bleeding</b>            | Intracranial hemorrhage + gastrointestinal bleeding        |                                                                                               |
| <b>Composite outcome</b>         | Recurrent stroke + major bleeding                          |                                                                                               |
| <b>Fatal recurrent stroke</b>    | In-hospital death from “Recurrent stroke”                  |                                                                                               |
| <b>Fatal major bleeding</b>      | In-hospital death from “Major bleeding”                    |                                                                                               |
| <b>Fatal composite outcome</b>   | In-hospital death from “Recurrent stroke + major bleeding” |                                                                                               |
| <b>All-cause death</b>           | In-hospital death from any causes                          |                                                                                               |

Abbreviation: COPD, chronic obstructive pulmonary disease; MI, myocardial infarction; NSAID, non-steroidal anti-inflammatory drug; PAD, peripheral artery disease; RID, Rare Intractable Disease program.

\*Labile international normalized ratio (INR) and alcohol use could not be evaluated from claims and were excluded from scoring in this study.

**Table S2. Characteristics of study population after IPTW adjustment**

|                                                 | <b>Warfarin</b> | <b>DOAC</b>  | <b>ASD</b> | <b>Rivaroxaban</b> | <b>Dabigatran</b> | <b>Apixaban</b> | <b>Edoxaban</b> | <b>ASD</b> |
|-------------------------------------------------|-----------------|--------------|------------|--------------------|-------------------|-----------------|-----------------|------------|
| <b>Male</b>                                     | 15100 (52.2)    | 17042 (52.1) | 0.003      | 6399 (52.1)        | 3284 (52.1)       | 4583 (52.0)     | 2776 (52.1)     | 0.002      |
| <b>Age</b>                                      |                 |              | 0.001      |                    |                   |                 |                 | 0.003      |
| Mean±SD                                         | 74.2±9.1        | 74.2±9.5     |            | 74.3±9.3           | 74.3±9.6          | 74.1±9.8        | 74.4±9.4        |            |
| Median (IQR)                                    | 75 (69-81)      | 75 (69-81)   |            | 75 (69-81)         | 75 (69-81)        | 75 (68-81)      | 75 (69-81)      |            |
| <65 years                                       | 3863 (13.4)     | 4899 (15.0)  |            | 1824 (14.9)        | 929 (14.7)        | 1361 (15.5)     | 785 (14.7)      |            |
| 65-74 years                                     | 9784 (33.8)     | 10096 (30.9) |            | 3795 (30.9)        | 1960 (31.1)       | 2687 (30.5)     | 1654 (31.0)     |            |
| 75≤ years                                       | 15272 (52.8)    | 17729 (54.2) |            | 6663 (54.3)        | 3414 (54.2)       | 4760 (54.0)     | 2892 (54.2)     |            |
| <b>CHA<sub>2</sub>DS<sub>2</sub>-VASc score</b> |                 |              | 0.002      |                    |                   |                 |                 | 0.005      |
| Mean±SD                                         | 5.9±1.5         | 5.9±1.4      |            | 5.9±1.4            | 5.9±1.5           | 5.8±1.4         | 5.9±1.5         |            |
| Median (IQR)                                    | 6 (5-7)         | 6 (5-7)      |            | 6 (5-7)            | 6 (5-7)           | 6 (5-7)         | 6 (5-7)         |            |
| 2                                               | 274 (1.0)       | 346 (1.1)    |            | 105 (0.9)          | 76 (1.2)          | 111 (1.3)       | 55 (1.0)        |            |
| 3≤                                              | 28645 (99.0)    | 32378 (98.9) |            | 12178 (99.1)       | 6226 (98.8)       | 8697 (98.7)     | 5277 (99.0)     |            |
| <b>HAS-BLED score</b>                           |                 |              | 0.002      |                    |                   |                 |                 | 0.003      |
| Mean±SD                                         | 4.23±1.07       | 4.23±1.1     |            | 4.2±1.1            | 4.2±1.1           | 4.2±1.1         | 4.3±1.1         |            |
| Median (IQR)                                    | 4 (4-5)         | 4 (4-5)      |            | 4 (4-5)            | 4 (4-5)           | 4 (4-5)         | 4 (4-5)         |            |
| 3≤                                              | 27570 (95.3)    | 31036 (94.8) |            | 11626 (94.7)       | 5994 (95.1)       | 8356 (94.9)     | 5061 (94.9)     |            |
| <b>CCI</b>                                      |                 |              | 0.001      |                    |                   |                 |                 | 0.001      |
| Mean±SD                                         | 5.01±2.49       | 5.0±2.6      |            | 5.0±2.6            | 5.0±2.6           | 5.0±2.5         | 5.1±2.6         |            |
| Median (IQR)                                    | 5 (3-7)         | 5 (3-7)      |            | 5 (3-7)            | 5 (3-7)           | 5 (3-7)         | 5 (3-7)         |            |

|                                           |              |              |        |              |             |             |             |       |
|-------------------------------------------|--------------|--------------|--------|--------------|-------------|-------------|-------------|-------|
| 3≤                                        | 24261 (83.9) | 27270 (83.3) |        | 10217 (83.2) | 5274 (83.7) | 7353 (83.5) | 4427 (83.0) |       |
| <b>Hypertension</b>                       | 25961 (89.8) | 29429 (89.9) | 0.005  | 11072 (90.1) | 5669 (89.0) | 7896 (89.6) | 4793 (89.9) | 0.012 |
| <b>Diabetes mellitus</b>                  | 9577 (33.1)  | 10867 (33.2) | 0.002  | 4048 (33.0)  | 2108 (33.5) | 2921 (33.2) | 1790 (33.6) | 0.003 |
| <b>Dyslipidemia</b>                       | 19192 (66.4) | 21759 (66.5) | 0.003  | 8172 (66.5)  | 4154 (65.9) | 5865 (66.6) | 3567 (66.9) | 0.004 |
| <b>Congestive heart failure</b>           | 12622 (43.7) | 14292 (43.7) | 0.001  | 5404 (44.0)  | 2726 (43.3) | 3840 (43.6) | 2322 (43.6) | 0.007 |
| <b>Myocardial infarction</b>              | 1703 (5.9)   | 1928 (5.9)   | <0.001 | 725 (5.9)    | 374 (5.9)   | 519 (5.9)   | 310 (5.8)   | 0.001 |
| <b>Peripheral arterial disease</b>        | 7905 (27.3)  | 8919 (27.3)  | 0.002  | 3341 (27.2)  | 1716 (27.2) | 2385 (27.1) | 1477 (27.7) | 0.003 |
| <b>COPD</b>                               | 3819 (13.2)  | 4317 (13.2)  | <0.001 | 1636 (13.3)  | 832 (13.2)  | 1134 (12.9) | 716 (13.4)  | 0.003 |
| <b>Cancer</b>                             | 2176 (7.5)   | 2419 (7.4)   | 0.005  | 907 (7.4)    | 463 (7.4)   | 663 (7.5)   | 386 (7.2)   | 0.005 |
| <b>Previous Intracranial hemorrhage</b>   | 1617 (5.6)   | 1859 (5.7)   | 0.004  | 695 (5.7)    | 352 (5.6)   | 499 (5.7)   | 312 (5.9)   | 0.003 |
| <b>Previous gastrointestinal bleeding</b> | 6061 (21.0)  | 6780 (20.7)  | 0.006  | 2546 (20.7)  | 1315 (20.9) | 1826 (20.7) | 1094 (20.5) | 0.006 |
| <b>Antiplatelets</b>                      |              |              | 0.002  |              |             |             |             | 0.001 |
| No antiplatelets                          | 16133 (55.8) | 18216 (55.7) |        | 6849 (55.8)  | 3496 (55.5) | 4971 (56.4) | 2901 (54.4) |       |
| Aspirin only                              | 6160 (21.3)  | 7003 (21.4)  |        | 2594 (21.1)  | 1360 (21.6) | 1860 (21.1) | 1189 (22.3) |       |
| Clopidogrel only                          | 2802 (9.7)   | 3195 (9.8)   |        | 1202 (9.8)   | 608 (9.6)   | 853 (9.7)   | 532 (10.0)  |       |
| Dual antiplatelets                        | 3823 (13.2)  | 4309 (13.2)  |        | 1637 (13.3)  | 838 (13.3)  | 1124 (12.8) | 710 (13.3)  |       |
| <b>NSAID</b>                              | 13232 (45.8) | 14923 (45.6) | 0.003  | 5607 (45.7)  | 2886 (45.8) | 4016 (45.6) | 2413 (45.3) | 0.002 |
| <b>Proton pump inhibitors</b>             | 10022 (34.7) | 11275 (34.5) | 0.004  | 4273 (34.8)  | 2157 (34.2) | 3017 (34.3) | 1828 (34.3) | 0.003 |

The numbers are presented as mean ± standard deviation, median (IQR), or numbers (percentage) otherwise mentioned.

Abbreviation: ASD, absolute standardized difference; CCI, charlson comorbidity index; COPD, chronic obstructive pulmonary disease; DOAC, direct oral anticoagulant; IPTW, inverse probability treatment weighting; IQR, interquartile range; NSAID, non-steroidal anti-inflammatory drug; SD, standard deviation.

**Table S3. Subgroup analysis of clinical outcomes according to antithrombotic therapy**

| Subgroups                                 |          | Total number | Recurrent stroke | Major bleeding | Composite outcome | All-cause death | Fatal recurrent stroke | Fatal major bleeding | Fatal composite outcome |
|-------------------------------------------|----------|--------------|------------------|----------------|-------------------|-----------------|------------------------|----------------------|-------------------------|
| <b>Sex</b>                                |          |              |                  |                |                   |                 |                        |                      |                         |
| <b>Male</b>                               | Warfarin | 15338        | 1195 (4.4)       | 689 (2.4)      | 1793 (6.7)        | 1556 (5.4)      | 201 (0.7)              | 92 (0.3)             | 290 (1.0)               |
|                                           | DOAC     | 16703        | 533 (3.6)        | 309 (2.1)      | 816 (5.6)         | 1071 (7.2)      | 124 (0.8)              | 26 (0.2)             | 150 (1.0)               |
| <b>Female</b>                             | Warfarin | 13501        | 1227 (5.6)       | 606 (2.7)      | 1747 (8.2)        | 1493 (6.5)      | 273 (1.2)              | 105 (0.5)            | 375 (1.6)               |
|                                           | DOAC     | 16026        | 552 (4.3)        | 301 (2.3)      | 833 (6.5)         | 1059 (8.1)      | 171 (1.3)              | 32 (0.2)             | 201 (1.5)               |
| <b>Age (years)</b>                        |          |              |                  |                |                   |                 |                        |                      |                         |
| <b>≥75</b>                                | Warfarin | 13827        | 1141 (6.2)       | 614 (3.2)      | 1678 (9.4)        | 2001 (10.4)     | 313 (1.6)              | 120 (0.6)            | 431 (2.2)               |
|                                           | DOAC     | 18980        | 622 (4.4)        | 403 (2.8)      | 994 (7.1)         | 1706 (12.0)     | 227 (1.6)              | 40 (0.3)             | 266 (1.8)               |
| <b>&lt;75</b>                             | Warfarin | 15012        | 1281 (4.1)       | 681 (2.1)      | 1862 (6.2)        | 1048 (3.2)      | 161 (0.5)              | 77 (0.2)             | 234 (0.7)               |
|                                           | DOAC     | 13749        | 463 (3.4)        | 207 (1.5)      | 655 (4.9)         | 424 (3.1)       | 68 (0.5)               | 18 (0.1)             | 85 (0.6)                |
| <b>CHA<sub>2</sub>DS<sub>2</sub>-VASc</b> |          |              |                  |                |                   |                 |                        |                      |                         |
| <b>≥3</b>                                 | Warfarin | 28506        | 2397 (4.9)       | 1288 (2.6)     | 3509 (7.4)        | 3042 (5.9)      | 474 (0.9)              | 197 (0.4)            | 665 (1.3)               |
|                                           | DOAC     | 32436        | 1082 (4.0)       | 609 (2.2)      | 1645 (6.1)        | 2125 (7.7)      | 292 (1.0)              | 58 (0.2)             | 348 (1.2)               |
| <b>&lt;3</b>                              | Warfarin | 333          | 25 (3.4)         | 7 (0.9)        | 31 (4.2)          | 7 (0.9)         | 0 (0.0)                | 0 (0.0)              | 0 (0.0)                 |
|                                           | DOAC     | 293          | 3 (1.0)          | 1 (0.3)        | 4 (1.3)           | 5 (1.6)         | 3 (1.0)                | 0 (0.0)              | 3 (1.0)                 |
| <b>HAS-BLED</b>                           |          |              |                  |                |                   |                 |                        |                      |                         |
| <b>≥3</b>                                 | Warfarin | 27534        | 2325 (4.9)       | 1256 (2.6)     | 3410 (7.4)        | 2971 (5.9)      | 454 (0.9)              | 196 (0.4)            | 644 (1.3)               |
|                                           | DOAC     | 30997        | 1043 (4.0)       | 597 (2.2)      | 1594 (6.1)        | 2064 (7.7)      | 285 (1.1)              | 55 (0.2)             | 338 (1.3)               |
| <b>&lt;3</b>                              | Warfarin | 1305         | 97 (5.1)         | 39 (1.9)       | 130 (6.9)         | 78 (3.8)        | 20 (1.0)               | 1 (0.0)              | 21 (1.0)                |
|                                           | DOAC     | 1732         | 42 (3.3)         | 13 (1.0)       | 55 (4.3)          | 66 (5.1)        | 10 (0.8)               | 3 (0.2)              | 13 (1.0)                |
| <b>Diabetes</b>                           |          |              |                  |                |                   |                 |                        |                      |                         |
| <b>Yes</b>                                | Warfarin | 9869         | 846 (5.4)        | 469 (2.9)      | 1253 (8.2)        | 1244 (7.5)      | 172 (1.0)              | 74 (0.4)             | 244 (1.5)               |
|                                           | DOAC     | 10467        | 408 (4.9)        | 209 (2.5)      | 596 (7.2)         | 805 (9.4)       | 111 (1.3)              | 12 (0.1)             | 123 (1.4)               |
| <b>No</b>                                 | Warfarin | 18970        | 1576 (4.7)       | 826 (2.4)      | 2287 (7.0)        | 1805 (5.1)      | 302 (0.8)              | 123 (0.3)            | 421 (1.2)               |
|                                           | DOAC     | 22262        | 677 (3.5)        | 401 (2.1)      | 1053 (5.5)        | 1325 (6.8)      | 184 (0.9)              | 46 (0.2)             | 228 (1.2)               |

| <b>Hypertension</b>  |          |       |            |            |            |            |           |           |           |
|----------------------|----------|-------|------------|------------|------------|------------|-----------|-----------|-----------|
| <b>Yes</b>           | Warfarin | 26072 | 2235 (5.0) | 1208 (2.6) | 3276 (7.5) | 2794 (5.9) | 433 (0.9) | 184 (0.4) | 613 (1.3) |
|                      | DOAC     | 29265 | 1014 (4.1) | 573 (2.3)  | 1542 (6.3) | 1923 (7.6) | 273 (1.1) | 50 (0.2)  | 321 (1.3) |
| <b>No</b>            | Warfarin | 2767  | 187 (4.0)  | 87 (1.8)   | 264 (5.7)  | 255 (5.1)  | 41 (0.8)  | 13 (0.3)  | 52 (1.0)  |
|                      | DOAC     | 3464  | 71 (2.6)   | 37 (1.3)   | 107 (3.9)  | 207 (7.4)  | 22 (0.8)  | 8 (0.3)   | 30 (1.1)  |
| <b>Heart failure</b> |          |       |            |            |            |            |           |           |           |
| <b>Yes</b>           | Warfarin | 11972 | 987 (5.3)  | 532 (2.8)  | 1444 (8.0) | 1474 (7.5) | 197 (1.0) | 76 (0.4)  | 271 (1.4) |
|                      | DOAC     | 14780 | 485 (4.1)  | 297 (2.5)  | 759 (6.5)  | 1094 (9.1) | 114 (0.9) | 33 (0.3)  | 146 (1.2) |
| <b>No</b>            | Warfarin | 16867 | 1435 (4.7) | 763 (2.4)  | 2096 (7.0) | 1575 (4.8) | 277 (0.8) | 121 (0.4) | 394 (1.2) |
|                      | DOAC     | 17949 | 600 (3.8)  | 313 (2.0)  | 890 (5.7)  | 1036 (6.5) | 181 (1.1) | 25 (0.2)  | 205 (1.3) |
| <b>CKD</b>           |          |       |            |            |            |            |           |           |           |
| <b>Yes</b>           | Warfarin | 5079  | 356 (5.6)  | 255 (3.9)  | 583 (9.4)  | 854 (12.8) | 95 (1.4)  | 40 (0.6)  | 132 (2.0) |
|                      | DOAC     | 5438  | 193 (5.2)  | 152 (4.0)  | 334 (9.1)  | 631 (16.7) | 53 (1.4)  | 15 (0.4)  | 68 (1.8)  |
| <b>No</b>            | Warfarin | 23760 | 2066 (4.8) | 1040 (2.3) | 2957 (7.1) | 2195 (4.8) | 379 (0.8) | 157 (0.3) | 533 (1.2) |
|                      | DOAC     | 27291 | 892 (3.7)  | 458 (1.9)  | 1315 (5.6) | 1499 (6.2) | 242 (1.0) | 43 (0.2)  | 283 (1.2) |
| <b>CCI</b>           |          |       |            |            |            |            |           |           |           |
| <b>≥3</b>            | Warfarin | 24466 | 2173 (5.5) | 1144 (2.8) | 3161 (8.1) | 2780 (6.5) | 424 (1.0) | 172 (0.4) | 591 (1.4) |
|                      | DOAC     | 26808 | 997 (4.5)  | 555 (2.5)  | 1508 (7.0) | 1979 (8.9) | 267 (1.2) | 49 (0.2)  | 314 (1.4) |
| <b>&lt;3</b>         | Warfarin | 4373  | 249 (2.6)  | 151 (1.6)  | 379 (4.1)  | 269 (2.8)  | 50 (0.5)  | 25 (0.3)  | 74 (0.8)  |
|                      | DOAC     | 5921  | 88 (1.6)   | 55 (1.0)   | 141 (2.5)  | 151 (2.6)  | 28 (0.5)  | 9 (0.2)   | 37 (0.6)  |

Number of events (crude incidence rates, per 100 person-years)

Abbreviation: CCI, charlson comorbidity index; CKD, chronic kidney disease; DOAC, direct oral anticoagulant.

**Table S4. Crude and multivariate-adjusted risk of clinical outcomes according to antithrombotic therapy**

| <b>Outcome</b>                                                   | <b>Warfarin</b> |           | <b>DOAC</b>  |           | <b>Crude HR (95% CI)</b> | <b>p-value</b> | <b>Multivariate adjusted HR (95% CI)</b> | <b>p-value</b> |
|------------------------------------------------------------------|-----------------|-----------|--------------|-----------|--------------------------|----------------|------------------------------------------|----------------|
|                                                                  | <b>Event</b>    | <b>IR</b> | <b>Event</b> | <b>IR</b> |                          |                |                                          |                |
| <b>Recurrent stroke</b>                                          | 2422            | 4.9       | 1085         | 3.9       | 0.61 (0.57-0.66)         | <0.001         | 0.66 (0.61-0.71)                         | <0.001         |
| <b>Major bleeding</b>                                            | 1295            | 2.5       | 610          | 2.2       | 0.73 (0.66-0.81)         | <0.001         | 0.72 (0.66-0.81)                         | <0.001         |
| <b>Composite outcome<br/>(Recurrent stroke + Major bleeding)</b> | 3540            | 7.4       | 1649         | 6.0       | 0.65 (0.61-0.69)         | <0.001         | 0.68 (0.64-0.72)                         | <0.001         |
| <b>All-cause death</b>                                           | 3049            | 5.9       | 2130         | 7.6       | 0.95 (0.89-1.00)         | 0.069          | 0.84 (0.79-0.89)                         | <0.001         |
| <b>Fatal recurrent stroke</b>                                    | 474             | 0.9       | 295          | 1.0       | 0.72 (0.62-0.84)         | <0.001         | 0.65 (0.55-0.75)                         | <0.001         |
| <b>Fatal major bleeding</b>                                      | 197             | 0.4       | 58           | 0.2       | 0.49 (0.36-0.67)         | <0.001         | 0.47 (0.35-0.65)                         | <0.001         |
| <b>Fatal composite outcome</b>                                   | 665             | 1.3       | 351          | 1.2       | 0.67 (0.58-0.77)         | <0.001         | 0.61 (0.53-0.69)                         | <0.001         |

Abbreviation: CI, confidence interval; HR, hazard ratio; IR, incidence rate; DOAC, direct oral anticoagulant.



**Table S5. Crude and multivariate-adjusted risk of clinical outcomes according to antithrombotic therapy (Warfarin vs 4 DOACs)**

| Group       | Recurrent stroke        | IR     | Crude HR (95% CI) | Multivariate adjusted HR (95% CI) |
|-------------|-------------------------|--------|-------------------|-----------------------------------|
| Warfarin    | 2422                    | 4.9    | 1(Ref.)           | 1(Ref.)                           |
| Rivaroxaban | 388                     | 3.6    | 0.57 (0.51-0.63)  | 0.62 (0.55-0.69)                  |
| Dabigatran  | 260                     | 4.1    | 0.68 (0.60-0.78)  | 0.76 (0.67-0.86)                  |
| Apixaban    | 322                     | 4.5    | 0.69 (0.61-0.78)  | 0.71 (0.63-0.80)                  |
| Edoxaban    | 115                     | 3.5    | 0.47 (0.39-0.57)  | 0.49 (0.41-0.60)                  |
| Group       | Major bleeding          | IR     | Crude HR (95% CI) | Multivariate adjusted HR (95% CI) |
| Warfarin    | 1295                    | 2.5    | 1(Ref.)           | 1(Ref.)                           |
| Rivaroxaban | 264                     | 2.4    | 0.81 (0.71-0.93)  | 0.82 (0.71-0.94)                  |
| Dabigatran  | 141                     | 2.2    | 0.77 (0.64-0.91)  | 0.82 (0.68-0.97)                  |
| Apixaban    | 149                     | 2.1    | 0.68 (0.57-0.81)  | 0.64 (0.54-0.76)                  |
| Edoxaban    | 56                      | 1.7    | 0.51 (0.39-0.67)  | 0.50 (0.38-0.65)                  |
| Group       | Composite outcome       | IR     | Crude HR (95% CI) | Multivariate adjusted HR (95% CI) |
| Warfarin    | 3540                    | 7.4    | 1(Ref.)           | 1(Ref.)                           |
| Rivaroxaban | 635                     | 5.9    | 0.65 (0.60-0.71)  | 0.69 (0.63-0.75)                  |
| Dabigatran  | 385                     | 6.2    | 0.70 (0.63-0.78)  | 0.76 (0.69-0.85)                  |
| Apixaban    | 461                     | 6.5    | 0.69 (0.63-0.76)  | 0.69 (0.62-0.76)                  |
| Edoxaban    | 168                     | 5.1    | 0.48 (0.41-0.57)  | 0.49 (0.42-0.58)                  |
| Group       | All-cause death         | IR     | Crude HR (95% CI) | Multivariate adjusted HR (95% CI) |
| Warfarin    | 3049                    | 5.9    | 1(Ref.)           | 1(Ref.)                           |
| Rivaroxaban | 889                     | 8.0    | 1.04 (0.96-1.12)  | 0.92 (0.85-0.99)                  |
| Dabigatran  | 344                     | 5.4    | 0.72 (0.65-0.81)  | 0.75 (0.67-0.84)                  |
| Apixaban    | 647                     | 8.9    | 1.09 (0.99-1.19)  | 0.86 (0.79-0.94)                  |
| Edoxaban    | 250                     | 7.5    | 0.78 (0.69-0.89)  | 0.69 (0.60-0.78)                  |
| Group       | Fatal recurrent stroke  | IR     | Crude HR (95% CI) | Multivariate adjusted HR (95% CI) |
| Warfarin    | 474                     | 0.9    | 1(Ref.)           | 1(Ref.)                           |
| Rivaroxaban | 121                     | 1.1    | 0.78 (0.63-0.95)  | 0.71 (0.58-0.87)                  |
| Dabigatran  | 61                      | 1.0    | 0.73 (0.55-0.95)  | 0.73 (0.55-0.95)                  |
| Apixaban    | 85                      | 1.2    | 0.78 (0.62-0.98)  | 0.64 (0.50-0.81)                  |
| Edoxaban    | 28                      | 0.8    | 0.46 (0.31-0.67)  | 0.40 (0.27-0.58)                  |
| Group       | Fatal major bleeding    | IR     | Crude HR (95% CI) | Multivariate adjusted HR (95% CI) |
| Warfarin    | 197                     | 0.4    | 1(Ref.)           | 1(Ref.)                           |
| Rivaroxaban | 30                      | 0.3    | 0.65 (0.44-0.96)  | 0.63 (0.42-0.93)                  |
| Dabigatran  | 5                       | 0.1    | 0.19 (0.08-0.47)  | 0.20 (0.08-0.49)                  |
| Apixaban    | 15                      | 0.2    | 0.49 (0.29-0.83)  | 0.44 (0.26-0.76)                  |
| Edoxaban    | 8                       | 0.2399 | 0.53 (0.26-1.09)  | 0.50 (0.24-1.02)                  |
| Group       | Fatal composite outcome | IR     | Crude HR (95% CI) | Multivariate adjusted HR (95% CI) |
| Warfarin    | 665                     | 1.3    | 1(Ref.)           | 1(Ref.)                           |
| Rivaroxaban | 149                     | 1.3    | 0.74 (0.62-0.89)  | 0.69 (0.57-0.82)                  |
| Dabigatran  | 66                      | 1.0    | 0.60 (0.47-0.78)  | 0.61 (0.47-0.79)                  |
| Apixaban    | 100                     | 1.4    | 0.72 (0.58-0.89)  | 0.60 (0.48-0.75)                  |
| Edoxaban    | 36                      | 1.1    | 0.47 (0.34-0.67)  | 0.41 (0.30-0.58)                  |

Abbreviation: CI, confidence interval; HR, hazard ratio; IR, incidence rate; DOAC, direct oral anticoagulant.

**Table S6. Characteristics of the study population with warfarin and dosage of DOAC**

|                                                 | (A) Warfarin<br>(n=28839) | (B) Regular dose<br>DOAC<br>(n=12073) | (C) Reduced dose<br>DOAC<br>(n=20656) | A vs. B<br>p value | A vs. C<br>p value | B vs. C<br>p value |
|-------------------------------------------------|---------------------------|---------------------------------------|---------------------------------------|--------------------|--------------------|--------------------|
| <b>Age</b>                                      |                           |                                       |                                       |                    |                    |                    |
| Mean±SD                                         | 73.1±9.4                  | 71.7±9.4                              | 77.3±8.3                              | <0.001             | <0.001             | <0.001             |
| Median (IQR)                                    | 74 (68-79)                | 73 (66-78)                            | 78 (73-83)                            | <0.001             | <0.001             | <0.001             |
| <65 years                                       | 4757 (16.5)               | 2509 (20.8)                           | 1465 (7.1)                            | <0.001             | <0.001             | <0.001             |
| 65-74 years                                     | 10255 (35.6)              | 4612 (38.2)                           | 5163 (25.0)                           |                    |                    |                    |
| 75≤ years                                       | 13827 (48.0)              | 4952 (41.0)                           | 14028 (67.9)                          |                    |                    |                    |
| <b>Male</b>                                     | 15338 (53.2)              | 7269 (60.2)                           | 11222 (54.3)                          | <0.001             | <0.001             | <0.001             |
| <b>CHA<sub>2</sub>DS<sub>2</sub>-VASc score</b> |                           |                                       |                                       |                    |                    |                    |
| Mean±SD                                         | 5.8±1.5                   | 5.5±1.5                               | 6.2±8.2                               | <0.001             | <0.001             | <0.001             |
| 2                                               | 333 (1.2)                 | 221 (1.8)                             | 72 (0.4)                              | <0.001             | <0.001             | <0.001             |
| 3≤                                              | 28506 (98.8)              | 11852 (98.1)                          | 20584 (99.6)                          |                    |                    |                    |
| <b>HAS-BLED score</b>                           |                           |                                       |                                       |                    |                    |                    |
| Mean±SD                                         | 4.2±1.1                   | 4.0±1.1                               | 4.3±1.1                               | <0.001             | <0.001             | <0.001             |
| 3≤                                              | 27534 (95.5)              | 11103 (92.0)                          | 19894 (96.3)                          | <0.001             | <0.001             | <0.001             |
| <b>CCI</b>                                      |                           |                                       |                                       |                    |                    |                    |
| Mean±SD                                         | 5.2±2.5                   | 4.7±2.5                               | 5.0±2.5                               | <0.001             | <0.001             | <0.001             |
| 3≤                                              | 24466 (84.8)              | 9566 (79.2)                           | 17242 (83.5)                          | <0.001             | <0.001             | <0.001             |
| <b>Hypertension</b>                             | 26072 (90.4)              | 10633 (88.1)                          | 18632 (90.2)                          | <0.001             | 0.449              | <0.001             |

|                                           |              |             |              |        |        |        |
|-------------------------------------------|--------------|-------------|--------------|--------|--------|--------|
| <b>Diabetes mellitus</b>                  | 9869 (34.2)  | 3844 (31.8) | 6623 (32.1)  | <0.001 | <0.001 | 0.676  |
| <b>Dyslipidemia</b>                       | 18774 (65.1) | 8412 (69.7) | 13487 (65.3) | <0.001 | 0.655  | <0.001 |
| <b>Congestive heart failure</b>           | 11972 (41.5) | 5028 (41.7) | 9752 (47.2)  | 0.803  | <0.001 | <0.001 |
| <b>Myocardial infarction</b>              | 1836 (6.4)   | 546 (4.5)   | 1283 (6.2)   | <0.001 | 0.484  | <0.001 |
| <b>Peripheral arterial disease</b>        | 7668 (26.6)  | 3133 (26.0) | 5942 (28.8)  | 0.181  | <0.001 | <0.001 |
| <b>COPD</b>                               | 4080 (14.2)  | 1293 (10.7) | 2701 (13.1)  | <0.001 | <0.001 | <0.001 |
| <b>Cancer</b>                             | 2000 (6.9)   | 912 (7.6)   | 1629 (7.9)   | 0.026  | <0.001 | 0.278  |
| <b>Previous Intracranial hemorrhage</b>   | 1530 (5.3)   | 673 (5.6)   | 1286 (6.23)  | 0.271  | <0.001 | 0.017  |
| <b>Previous gastrointestinal bleeding</b> | 5039 (17.5)  | 2684 (22.3) | 4994 (24.2)  | <0.001 | <0.001 | <0.001 |
| <b>Antiplatelets</b>                      |              |             |              |        |        |        |
| No antiplatelets                          | 12731 (44.2) | 8199 (67.9) | 13255 (64.2) | <0.001 | <0.001 | <0.001 |
| Aspirin only                              | 7990 (27.7)  | 1793 (14.9) | 3390 (16.4)  |        |        |        |
| Clopidogrel only                          | 2816 (9.8)   | 1029 (8.5)  | 2180 (10.6)  |        |        |        |
| Dual antiplatelets                        | 5302 (18.4)  | 1052 (8.7)  | 1831 (8.9)   |        |        |        |
| <b>NSAID</b>                              | 13940 (48.3) | 5440 (45.1) | 8881 (43.0)  | <0.001 | <0.001 | <0.001 |
| <b>Proton pump inhibitors</b>             | 9090 (31.5)  | 4374 (36.2) | 7699 (37.3)  | <0.001 | <0.001 | 0.059  |

The numbers are presented as mean ± standard deviation, median (IQR), or numbers (percentage) otherwise mentioned.

Abbreviation: ASD, absolute standardized difference; CCI, charlson comorbidity index; COPD, chronic obstructive pulmonary disease; DOAC, direct oral anticoagulant; IPTW, inverse probability treatment weighting; IQR, interquartile range; NSAID, non-steroidal anti-inflammatory drug; SD, standard deviation.

**Table S7. Comparison of clinical outcomes between patients with warfarin and regular dose DOAC**

| <b>Outcome</b>                                                   | <b>Warfarin<br/>Event (IR)</b> | <b>Regular dose DOAC<br/>Event (IR)</b> | <b>*HR (95% CI)</b> | <b>p-value</b> |
|------------------------------------------------------------------|--------------------------------|-----------------------------------------|---------------------|----------------|
| <b>Recurrent stroke</b>                                          | 2362 (4.8)                     | 477 (4.4)                               | 0.70 (0.63-0.77)    | <0.001         |
| <b>Major bleeding</b>                                            | 1269 (2.5)                     | 214 (1.9)                               | 0.66 (0.57-0.76)    | <0.001         |
| <b>Composite outcome<br/>(Recurrent stroke + Major bleeding)</b> | 3456 (7.2)                     | 675 (6.2)                               | 0.69 (0.63-0.75)    | <0.001         |
| <b>Fatal recurrent stroke</b>                                    | 463 (0.9)                      | 99 (0.9)                                | 0.64 (0.51-0.80)    | <0.001         |
| <b>Fatal major bleeding</b>                                      | 187 (0.4)                      | 15 (0.1)                                | 0.34 (0.19-0.56)    | <0.001         |
| <b>Fatal composite outcome</b>                                   | 645 (1.2)                      | 114 (1.0)                               | 0.58 (0.47-0.71)    | <0.001         |
| <b>All-cause death</b>                                           | 2958 (5.7)                     | 651 (5.8)                               | 0.76 (0.70-0.83)    | <0.001         |

\* IPTW adjustment

Abbreviation: CI, confidence interval; DOAC, direct oral anticoagulant; HR, hazard ratio; IR, incidence rate.

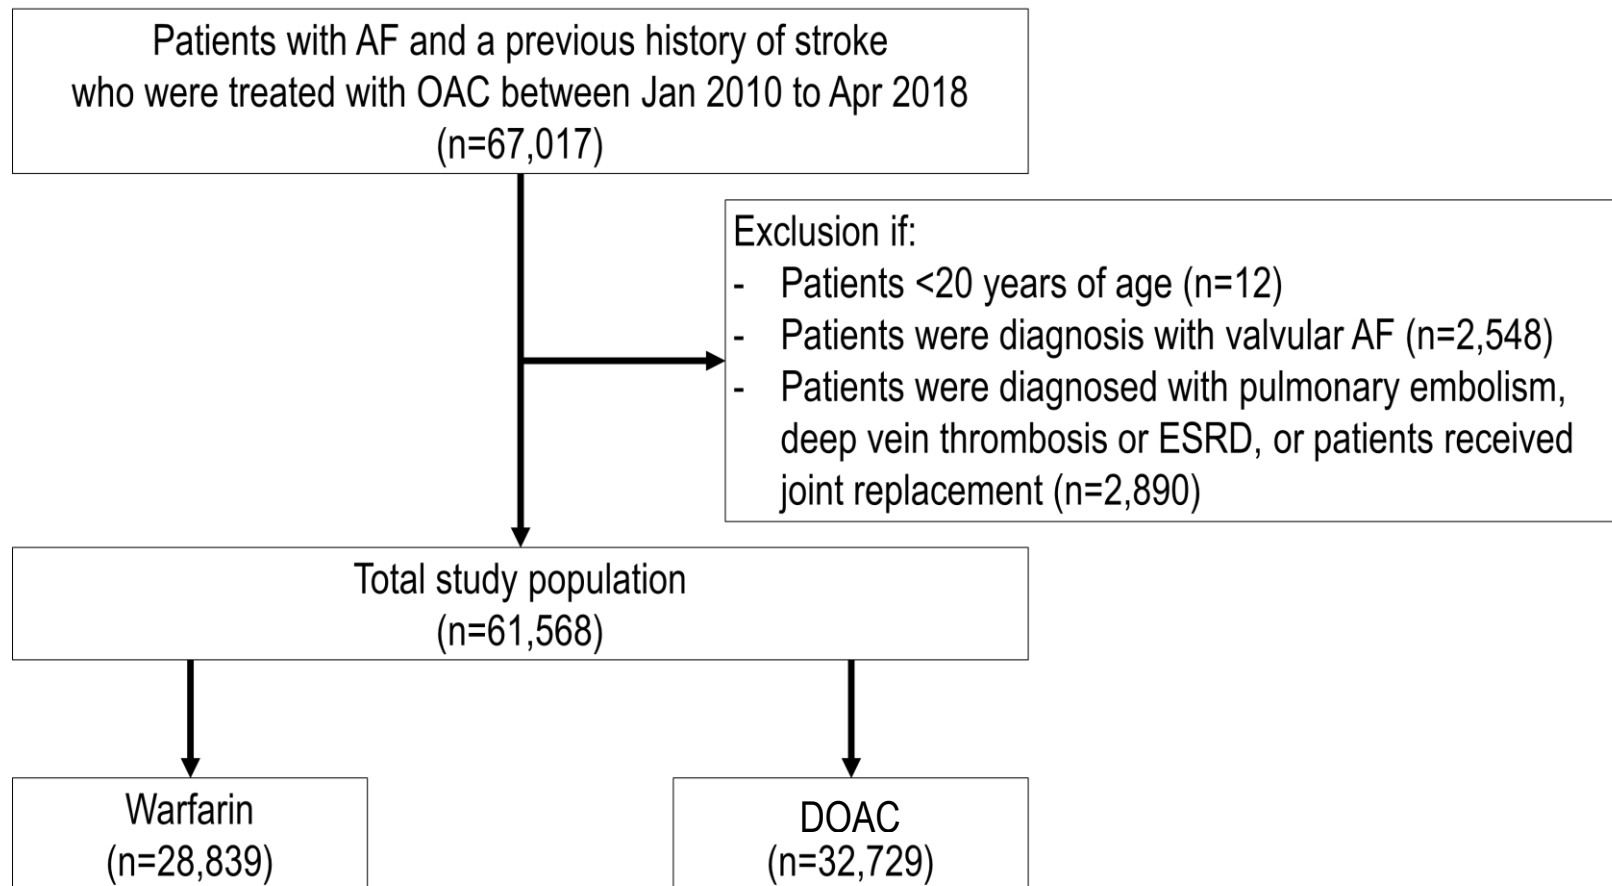

**Figure S1. Study flow**

AF = atrial fibrillation, DOAC = direct oral anticoagulant, ESRD = end stage renal disease, OAC = oral anticoagulant.

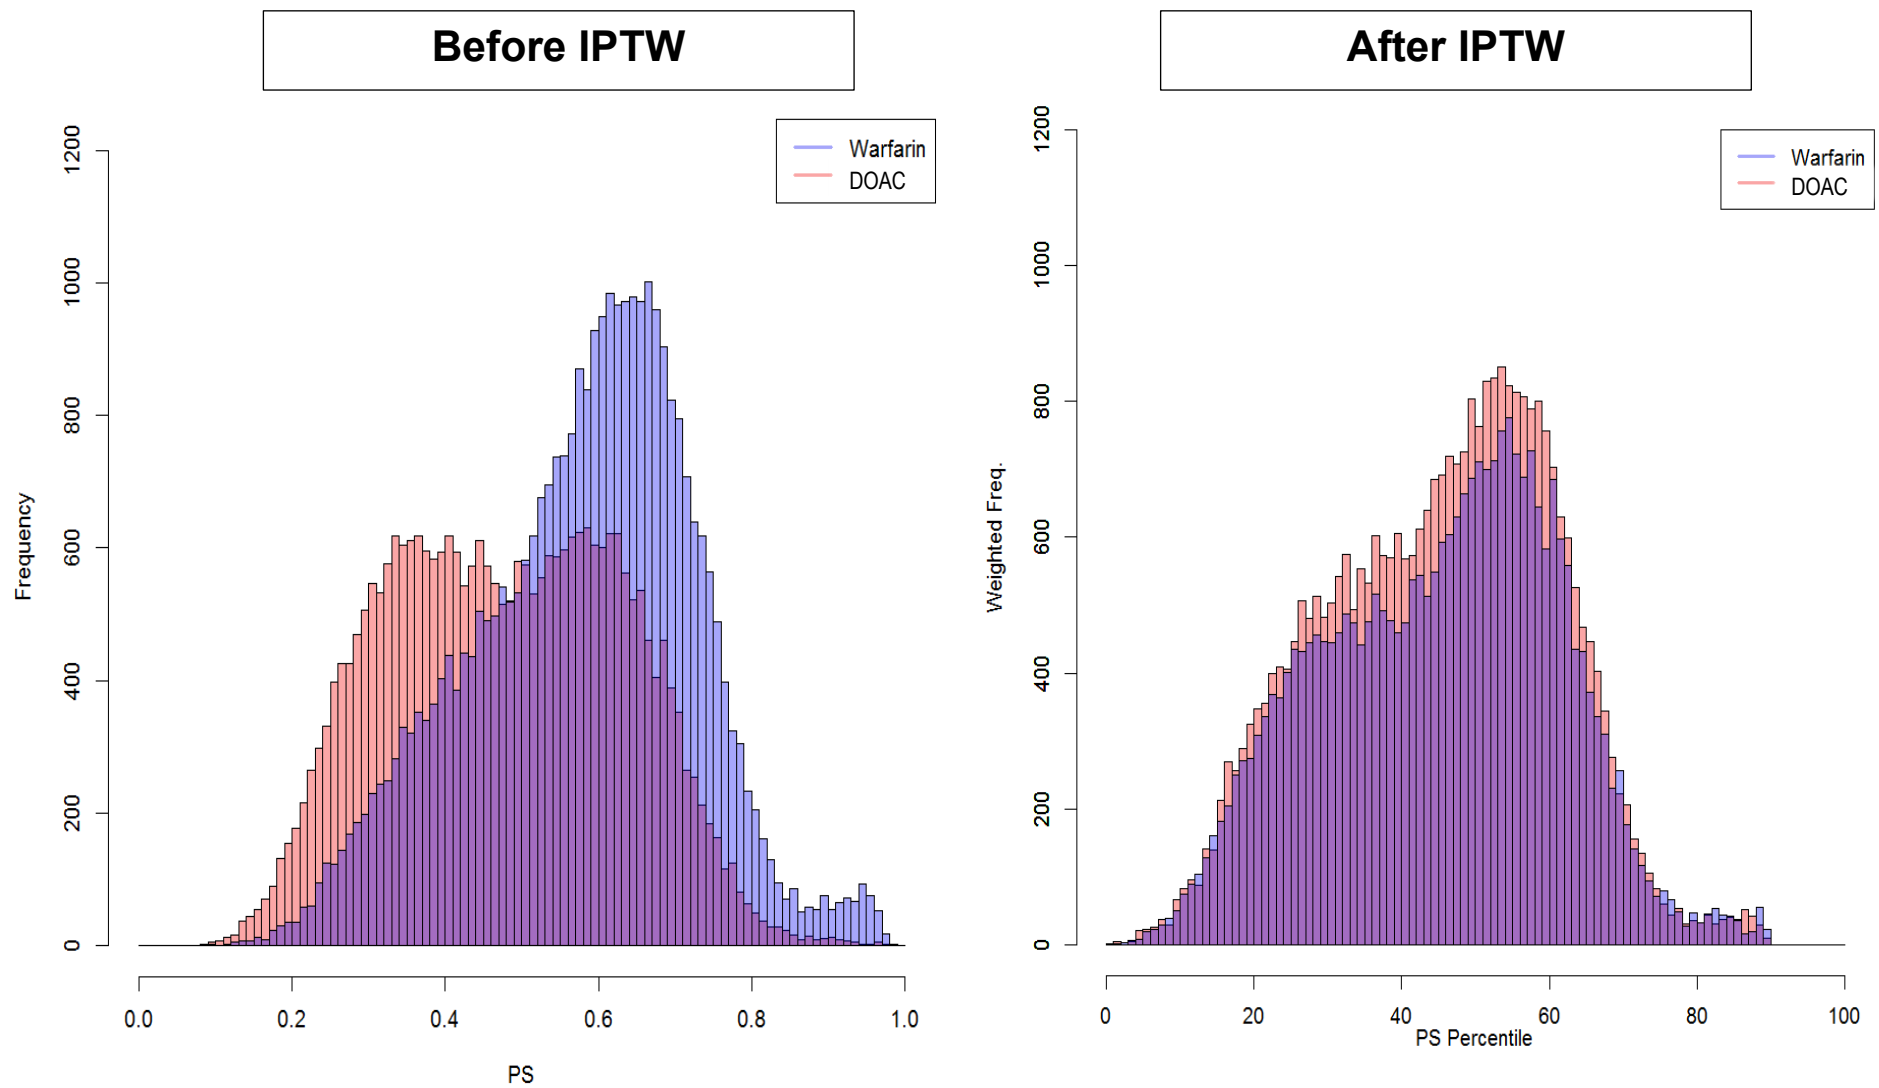

**Figure S2. Distribution of propensity scores before and after IPTW**

DOAC = direct oral anticoagulant, IPTW = inverse probability of treatment weights, PS = propensity score

**A. Recurrent stroke**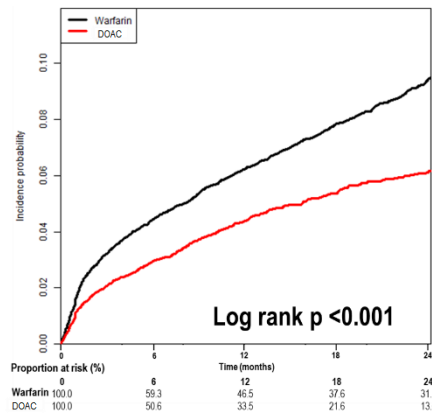**B. Major bleeding**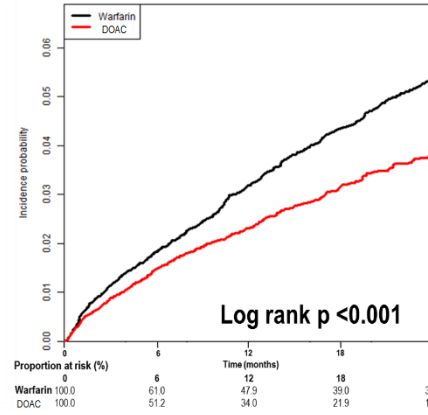**C. Composite outcome**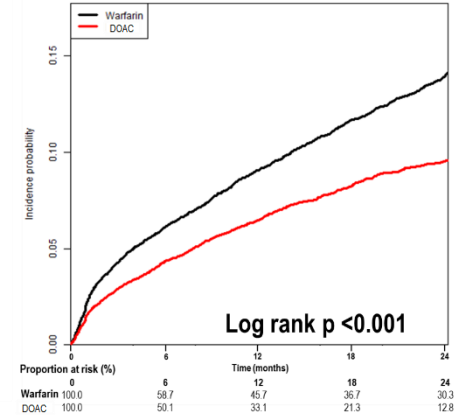**D. Fatal recurrent stroke**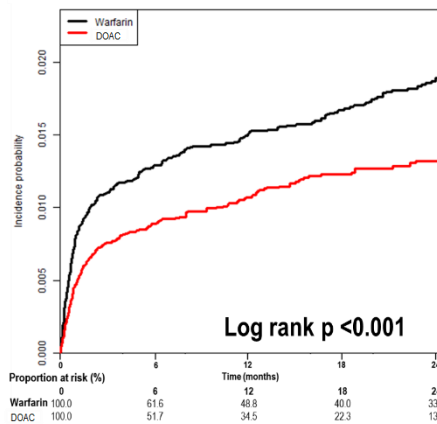**E. Fatal major bleeding**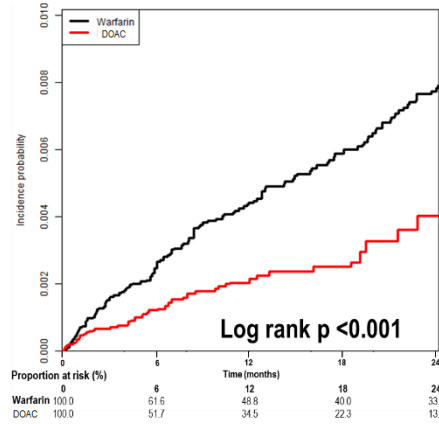**F. Fatal composite outcome**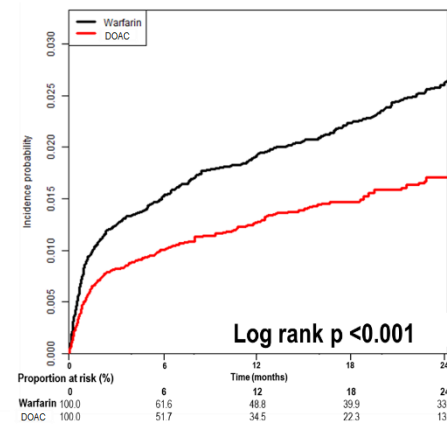**G. All-cause death**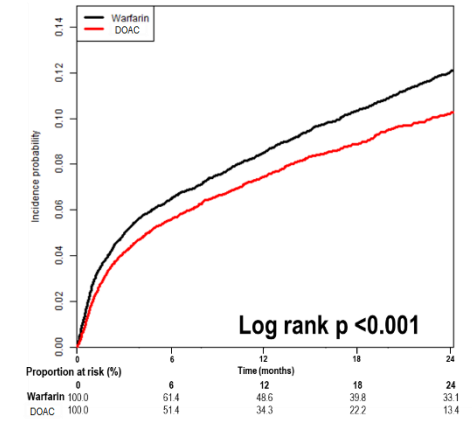**Figure S3. Kaplan-Meier curve of clinical outcomes according to antithrombotic therapy (Warfarin vs. pooled DOACs)**

DOAC = direct oral anticoagulant

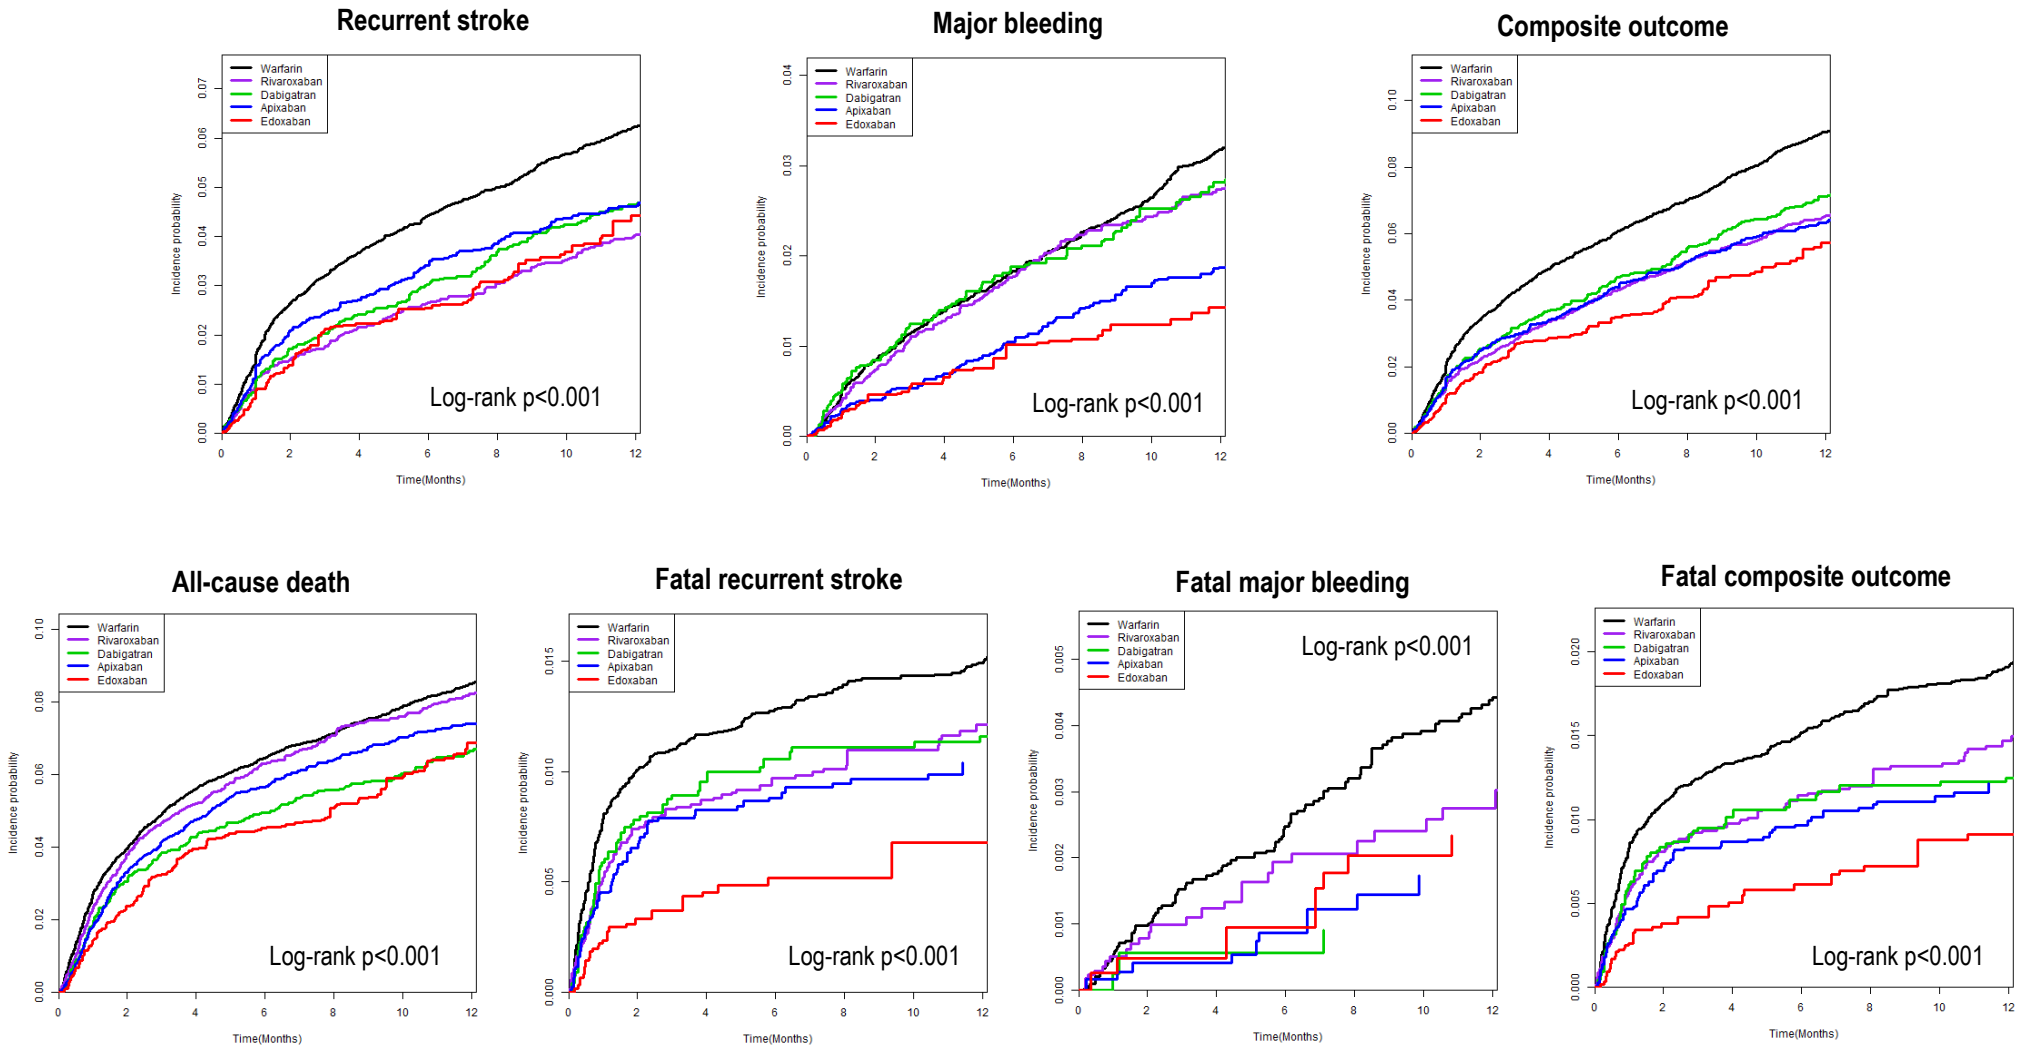

**Figure S4. Kaplan-Meier curve of clinical outcomes according to antithrombotic therapy (Warfarin vs. 4 DOACs)**

DOAC = direct oral anticoagulant



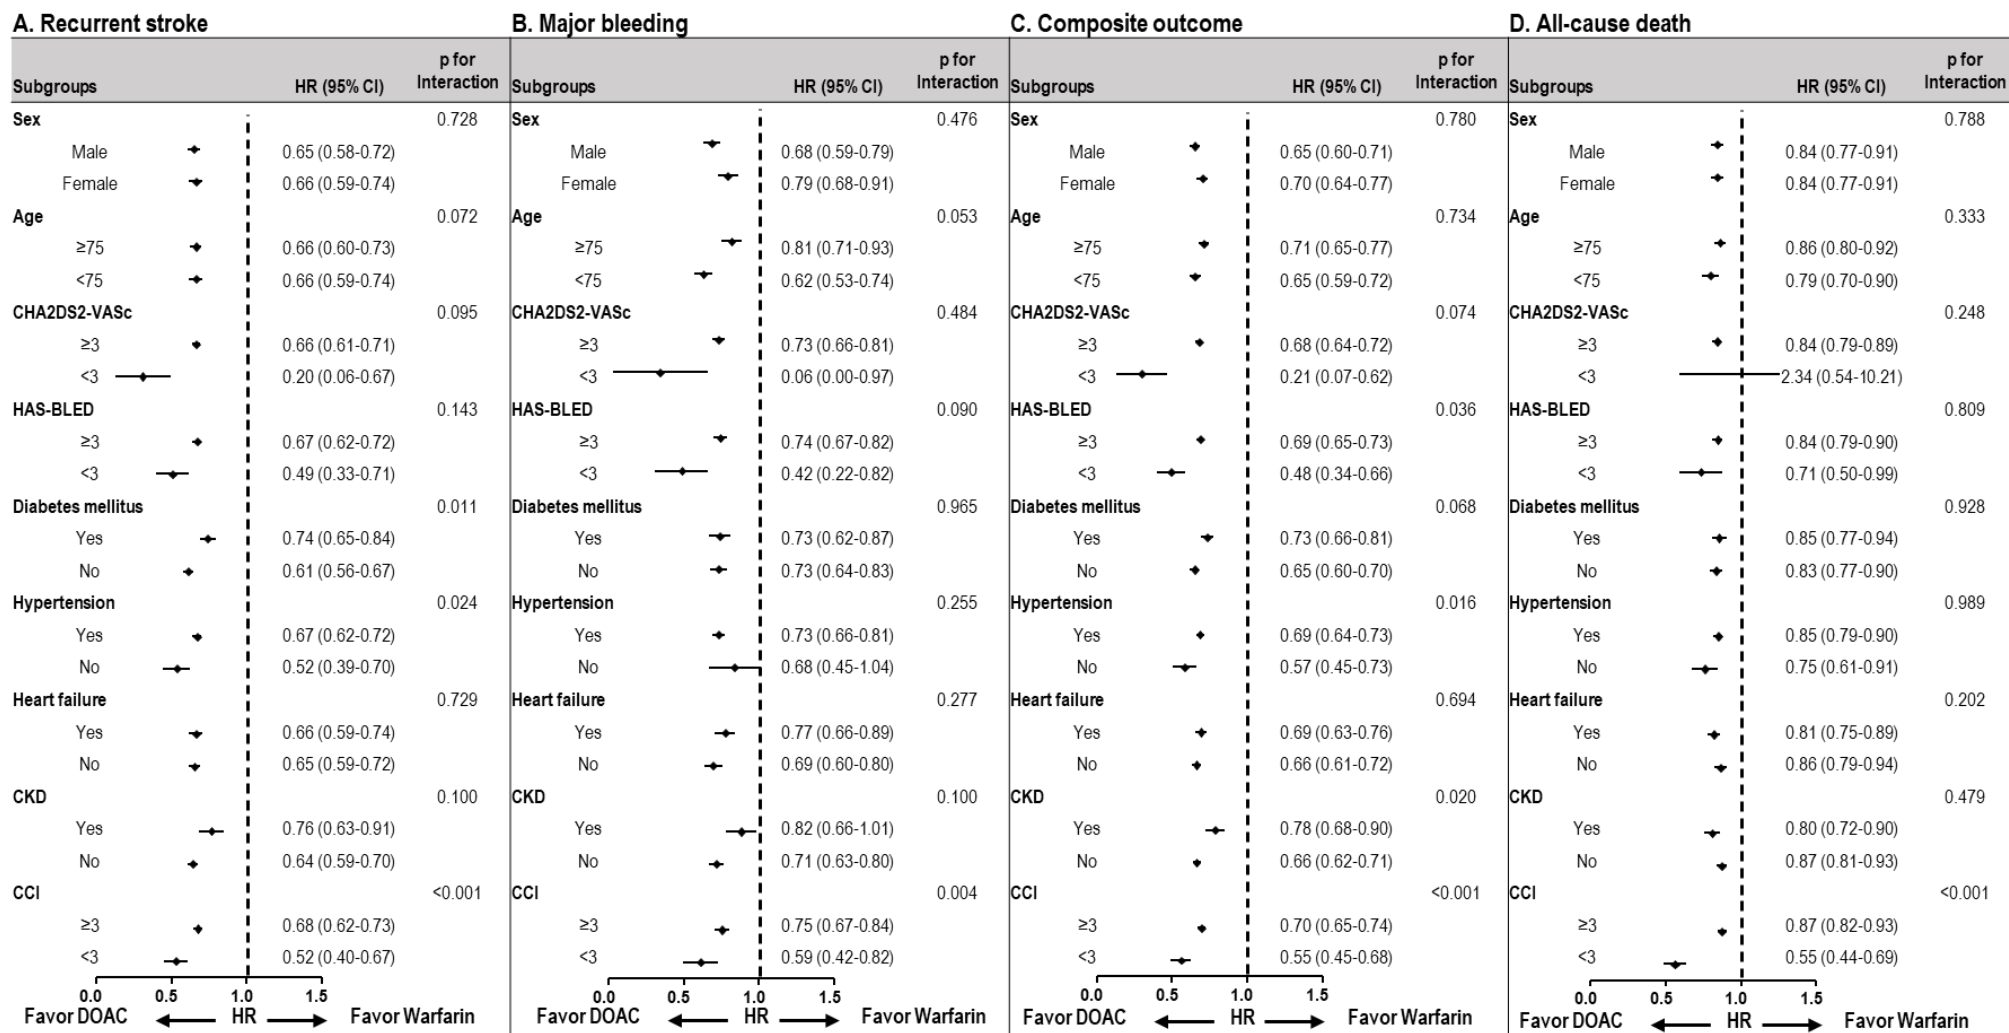

**Figure S5. Subgroup analysis of clinical outcomes according to antithrombotic therapy**

CCI = charlson comorbidity index, CI = confidence interval, CKD = chronic kidney disease, DOAC = direct oral anticoagulant, HR = hazard ratio

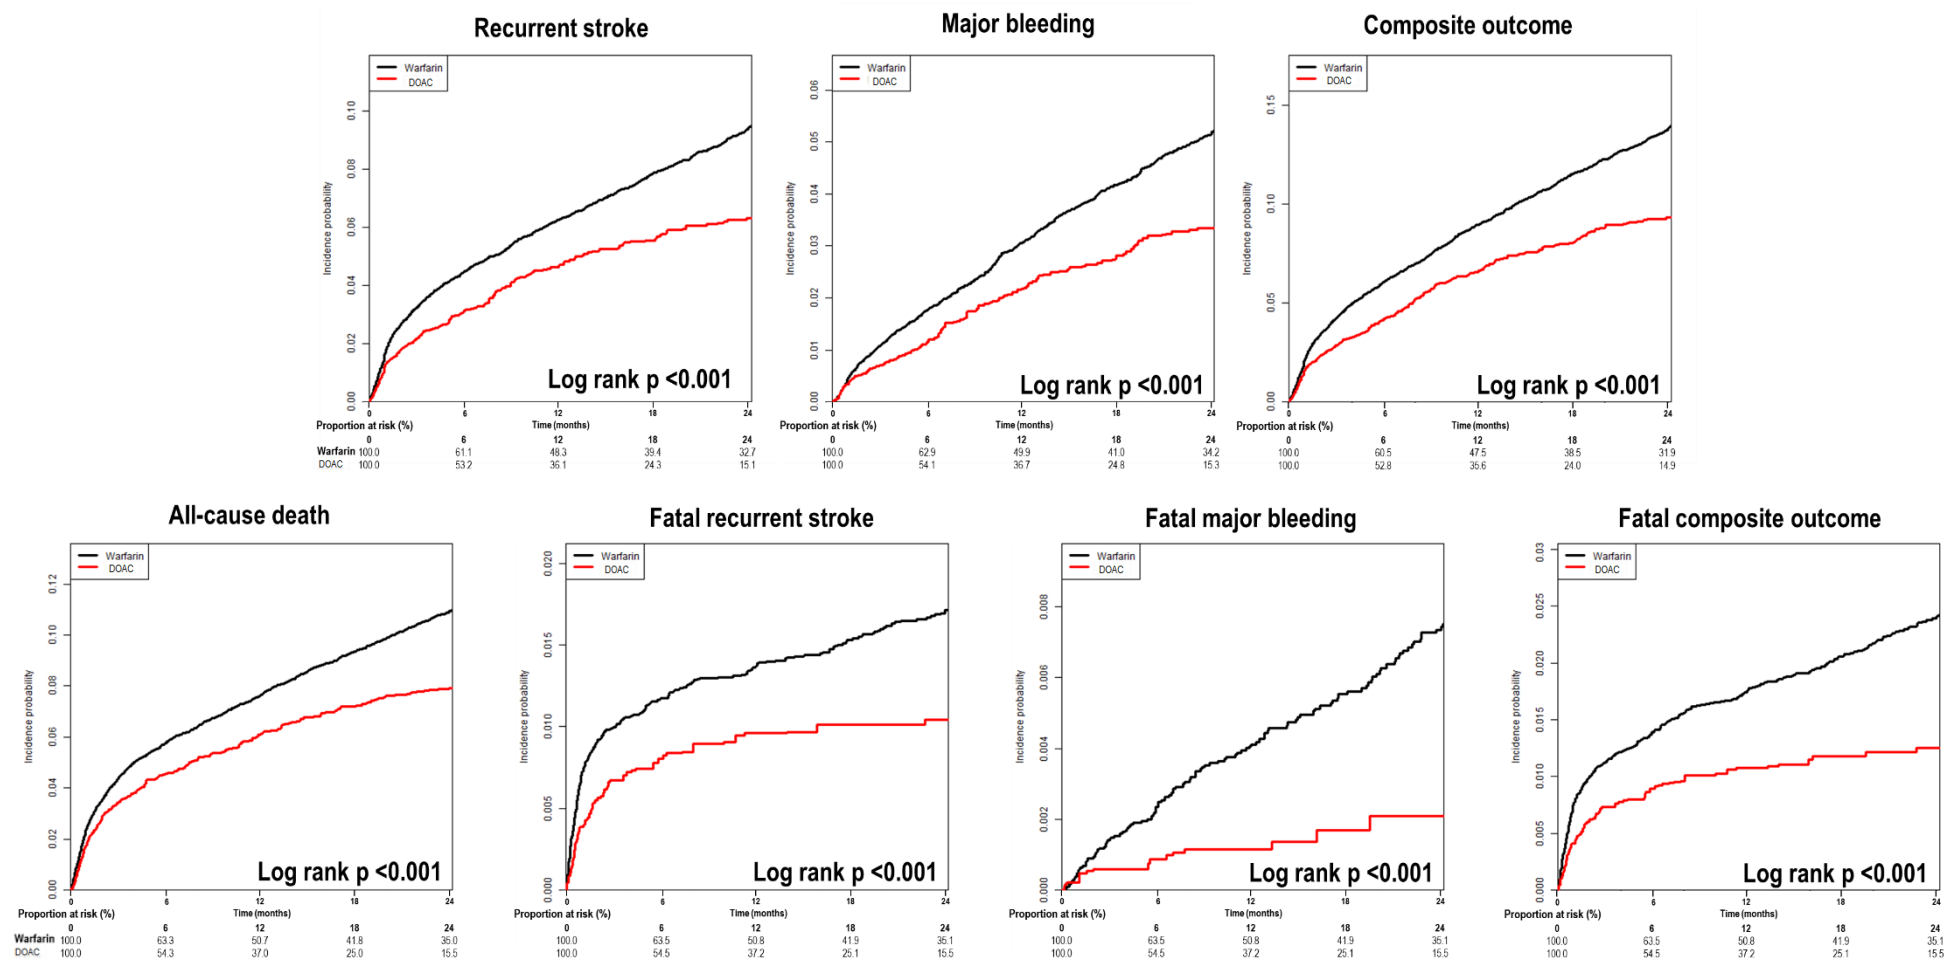

**Figure S6. Kaplan-Meier curve of clinical outcomes among patients with warfarin and regular dose DOAC**

DOAC = direct oral anticoagulant

### A. Recurrent stroke

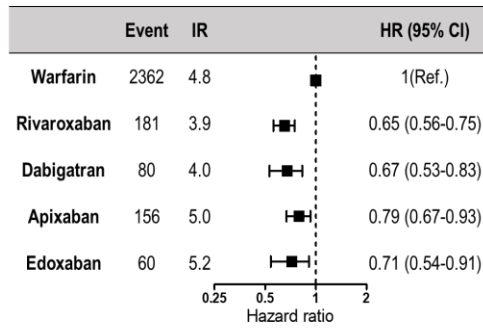

### B. Major bleeding

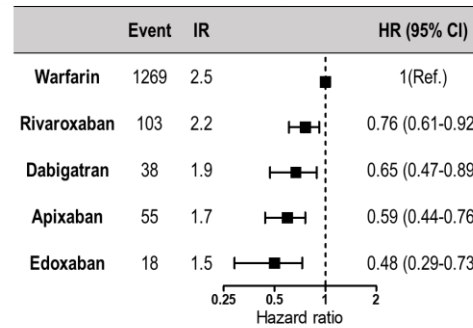

### C. Composite outcome

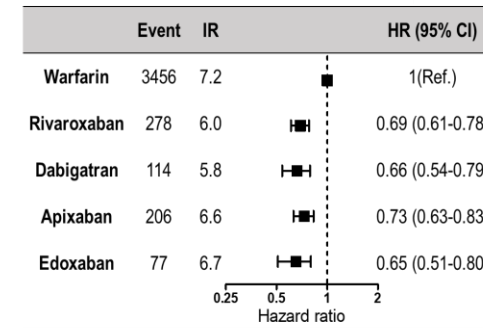

### D. Fatal recurrent stroke

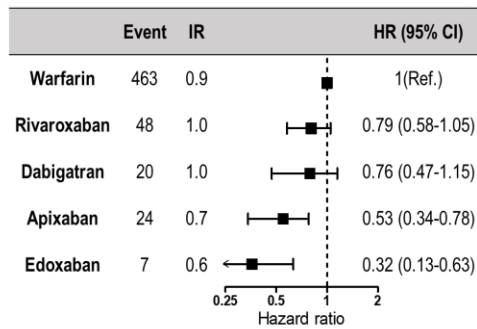

### E. Fatal major bleeding

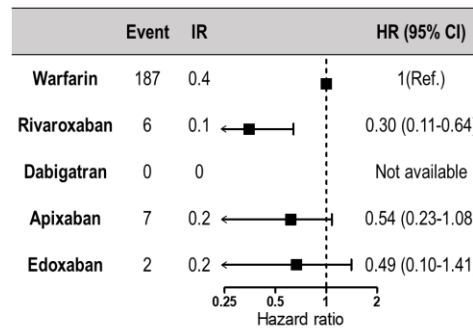

### F. Fatal composite outcome

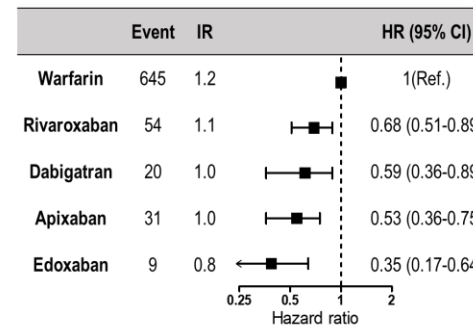

### G. All-cause death

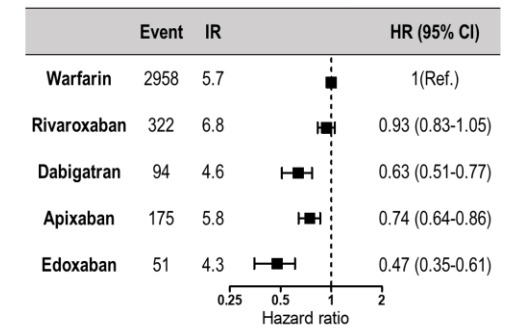

**Figure S7. Comparison of clinical outcomes between patients with warfarin and 4 regular dose DOACs**

CI = confidence interval, DOAC = direct oral anticoagulant, HR = hazard ratio, IR = incidence rate

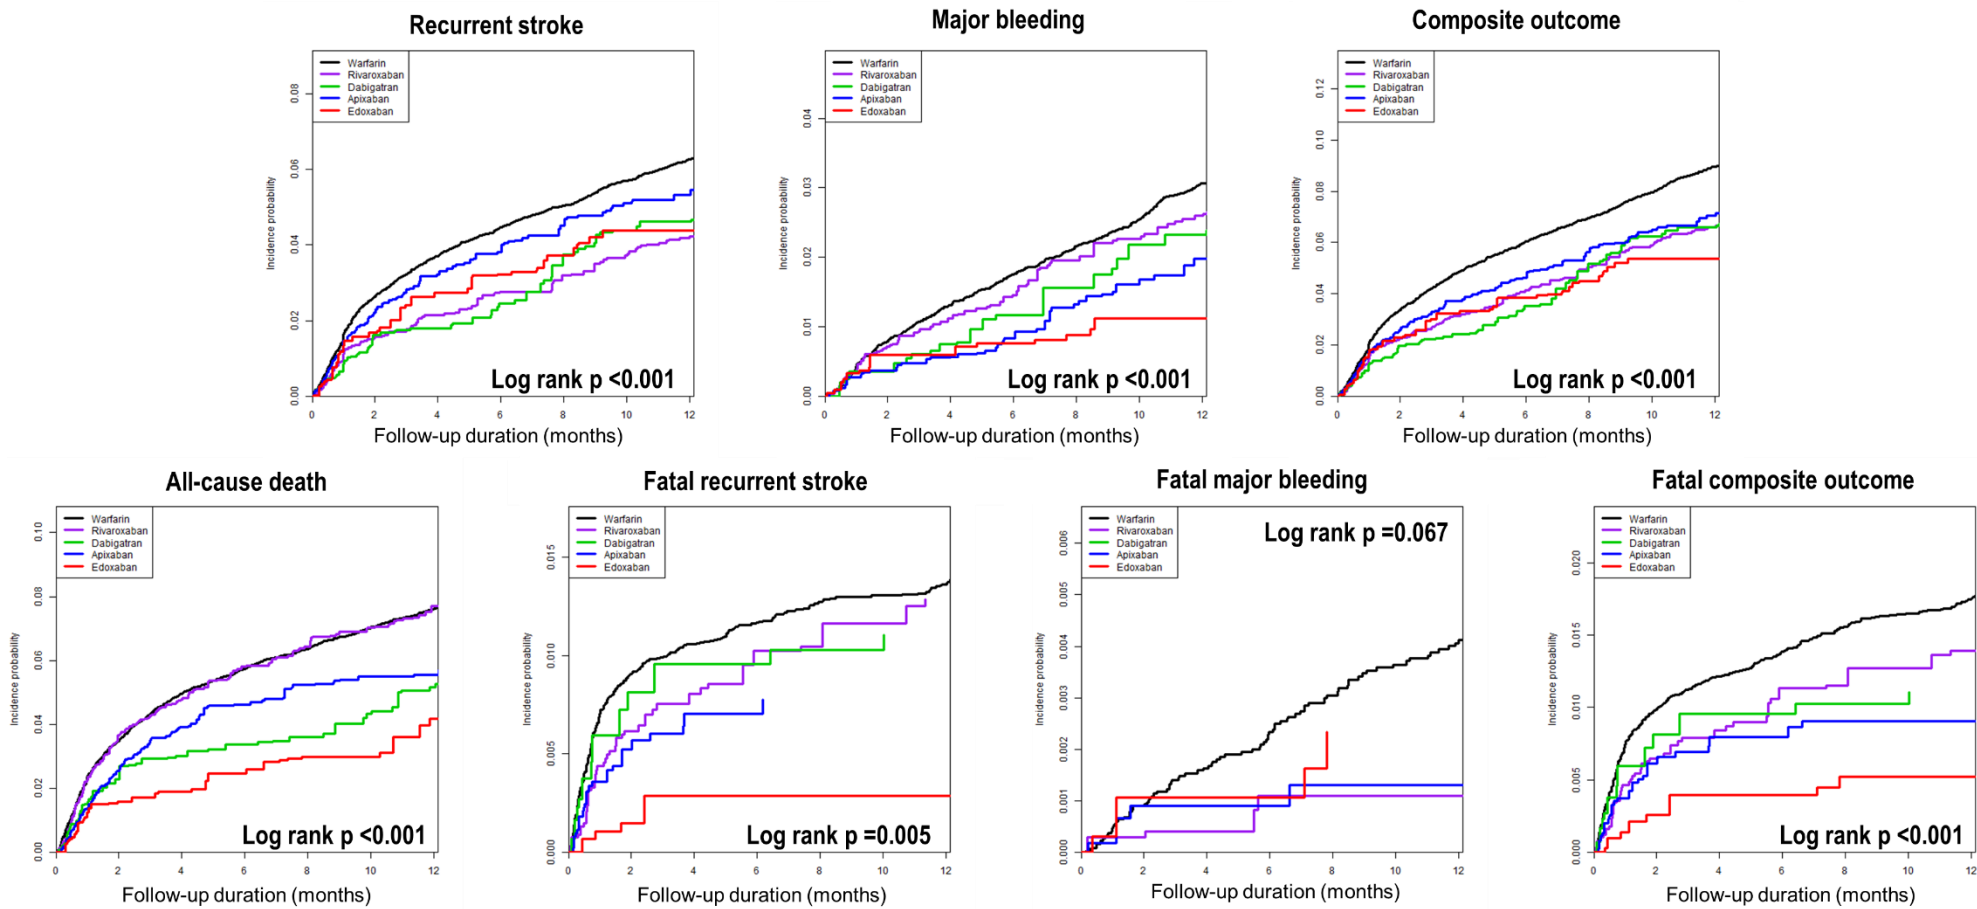

**Figure S8. Kaplan-Meier curve of clinical outcomes among patients with warfarin and four different regular dose DOAC**

DOAC = direct oral anticoagulant

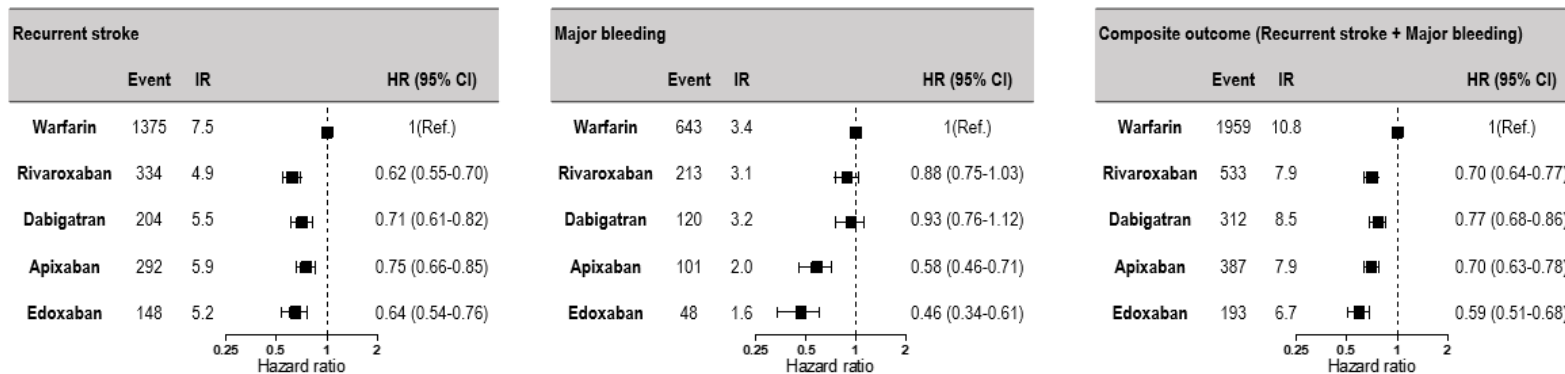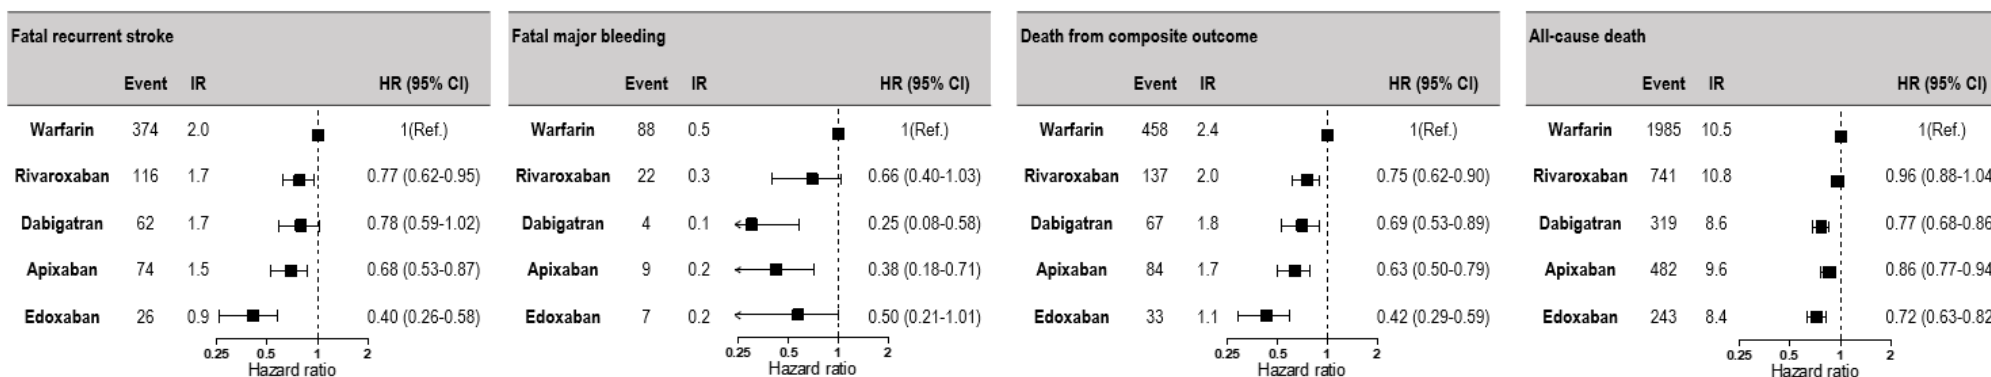

**Figure S9. Sensitivity analysis comparing clinical outcomes according to antithrombotic therapy during a 1-year follow-up**

CI = confidence interval, HR = hazard ratio, IR = incidence rate
